# Supplementary material
Source: publisher site journal article supplement (https://www.dovepress.com/article/291277)
Supplement: Supplementary file 1 [file get_supplementary_file.php]

**Supplementary material**

**Table S1 Targeted regions of sequencing and the 24 SNPs of *CYP3A5*.**

| **Chr** | **Start** | **End** | **SNPs** |
| --- | --- | --- | --- |
| chr7 | 99245909 | 99246069 | rs15524, rs28365085 |
| chr7 | 99247598 | 99247826 | 99247743A>G, rs41279854 |
| chr7 | 99247700 | 99247891 | 99247743A>G, rs41279854 |
| chr7 | 99250161 | 99250369 | rs28365083 |
| chr7 | 99250205 | 99250440 | rs28365083, rs41303343 |
| chr7 | 99250395 | 99250551 | rs28365094 |
| chr7 | 99258100 | 99258311 | rs28383479 |
| chr7 | 99260360 | 99260573 | rs4646453 |
| chr7 | 99260486 | 99260633 | rs72552790 |
| chr7 | 99262766 | 99262946 | rs10264272, rs56411402, rs28383472, rs147489136 |
| chr7 | 99264243 | 99264457 | 99264417T>C |
| chr7 | 99264558 | 99264740 | rs55965422 |
| chr7 | 99270091 | 99270288 | rs56244447 |
| chr7 | 99270210 | 99270415 | rs56244447 |
| chr7 | 99270394 | 99270618 | rs776746 |
| chr7 | 99273720 | 99273937 | rs28383468, rs28383469, rs55817950, rs72552791 |
| chr7 | 99273775 | 99273992 | rs28383468, rs28383469, rs55817950 |
| chr7 | 99277440 | 99277638 | rs28371764, rs28365095 |

**Note:** Genome assembly version: GRCh37.

**Abbreviations:** Chr, chromosome.
